# Supplementary material
Source: publisher site journal article supplement (https://www.dovepress.com/get_supplementary_file.php?f=397907.docx)
Supplement: Supplementary file 1 [file get_supplementary_file.php]

# Questioner support data

## Part 1: Socio-demographic characteristics

1. Gender 1. Female 2. male
2. Age(in years)----------
3. Marital status ---- 1.Maried 2. Single 3. Divorced/widowed
4. Educational status --- 1.diploma 2. Bachler degree 3.Master’s degree 4. others (specify)
5. Work experience (years)---------
6. Work department/Main activity on midwifery unit 1.Delivery unit**2.** Maternity 3.Maternal intensive care **4.**Prenatal visit 5.Postnatal ward 6.high-risk wards **7.** gynecologic ward
7. Years of Education ----
8. Experience in the current unit
9. Working Institution 1. Hospital 2. Health center
10. Monthly salary(Ethiopian Birr)-----------
11. Family Arrangement 1. Live with family 2. Live far from family

# Part 2: Midwives performance evaluation tool

## 2.1 Achieving organizational performance tool

**Table 1: questioner used to measure midwives organizational performance/2022.**

| Items | strongly disagree  (1) | Disagree  (2) | Neutral  (3) | Agree  (4) | Strongly agree(5) |
| --- | --- | --- | --- | --- | --- |
| I worked keeping my skills up to date |  |  |  |  |  |
| I actively participated in work meetings and training |  |  |  |  |  |
| I was able to perform my work well with minimal time and effort |  |  |  |  |  |
| My performance is recognized by the leaders |  |  |  |  |  |
| I always try to reach the hospital/health center expected performance |  |  |  |  |  |
| I perform well in my overall job by carrying out tasks as expected |  |  |  |  |  |

## 2.2 Customer satisfaction tool

**Table 2: Questioner used to measure customer satisfaction among midwives, may/2022.**

| Items | Strongly disagree  (1) | Disagree  (2) | Neutral  (3) | Agree  (4) | Strongly agree  (5) |
| --- | --- | --- | --- | --- | --- |
| Customers have a positive feedback after they receive the service |  |  |  |  |  |
| The service deliver processes takes short time |  |  |  |  |  |
| My leaders express satisfaction when I met expectation |  |  |  |  |  |

## 2.3. Teamwork in organizational performance tool

**Table 3: questioner used to measure Teamwork in organizational performance among midwives, may/2022.**

| Items | Strongly disagree  (1) | Disagree  (2) | Neutral  (3) | Agree  (4) | Strongly agree  (5) |
| --- | --- | --- | --- | --- | --- |
| There is teamwork in my department |  |  |  |  |  |
| My supervisor is a team player |  |  |  |  |  |
| My leaders award me for exceeding performance |  |  |  |  |  |
| I am given the needed support by my supervisor to builds team spirits |  |  |  |  |  |

# Part3: Styles of leadership evaluation tool

Table 4: questionnaires used to measure autocratic leadership style among midwifery leaders, may/2022

| Items | Strongly disagree  (1) | Disagree  (2) | Neutral (3) | Agree  (4) | Strongly agree  (5) |
| --- | --- | --- | --- | --- | --- |
| My manager believes midwives need to be supervised closely, or they are not likely to do their work |  |  |  |  |  |
| Usually my supervisor believes that midwives must be given rewards or punishments in order to motivate them to achieve organizational objectives |  |  |  |  |  |
| My manager believes most midwives feel insecure about their work and need direction. |  |  |  |  |  |
| My manager believes the leader is the chief judge of the achievements of the members |  |  |  |  |  |
| My manager believes effective leaders give orders and clarify procedures |  |  |  |  |  |

Table 5: questionnaires used to measure democratic leadership style among midwifery leaders, may/2022

| Items | Strongly disagree  (1) | Disagree(2) | Neutral  (3) | Agree  (4) | Strongly agree  (5) |
| --- | --- | --- | --- | --- | --- |
| The midwifery manager consults with midwives when facing a problem |  |  |  |  |  |
| The midwifery manager listens receptively to midwives’ ideas and suggestions |  |  |  |  |  |
| The midwifery manager act without consulting midwives (reversed scored) |  |  |  |  |  |
| The midwifery manager asks for from midwivesconcerning how to carry out assignments |  |  |  |  |  |
| The midwifery manager asks midwives for suggestions on what assignments should be made |  |  |  |  |  |

Table 6: questionnaires used to measure Lassie-faire leadership style among midwifery leaders, may/2022

| Items | Strongly disagreed  (1) | Disagree  (2) | Neutral  (3) | Agree  (4) | Strongly agree  (5) |
| --- | --- | --- | --- | --- | --- |
| When performance requirements designed, the supervisor relies only on his/her own judgment |  |  |  |  |  |
| My supervisor does not impose policies on me. |  |  |  |  |  |
| There is leadership freedom in my department. |  |  |  |  |  |
| My department performs without any leadership barriers or obstacle |  |  |  |  |  |
| I encourage others to do things on my way |  |  |  |  |  |
| The manager provide solution problems |  |  |  |  |  |
| Whenever I have a different point of view from that of my leader am not mistreated |  |  |  |  |  |
| My supervisor allows me to express my point of view openly |  |  |  |  |  |
